# Supplementary material for: Transcriptome Analysis and Metabolic Profiling Reveal the Key Regulatory Pathways in Drought Stress Responses and Recovery in Tomatoes
Source: MDPI journal article supplement (doi:10.3390/ijms25042187), 2024-02-11
Supplement: s1 [file s1]

**Journal:** International Journal of Molecular Sciences

**Title:** Transcriptome analysis and metabolic profiling reveal the key regulatory pathways in drought stress responses and recovery in tomato

**Author names:** Jinshuai Shu<sup>1, †, \*</sup>, Lili Zhang<sup>2, †</sup>, Guiming Liu<sup>2</sup>, Xiaoxuan Wang<sup>1</sup>, Fuzhong Liu<sup>1</sup>, Ying Zhang<sup>1</sup>, Yuhui Chen<sup>1</sup>

**Affiliation:** <sup>1</sup>State Key Laboratory of Vegetable Biobreeding, Institute of Vegetables and Flowers, Chinese Academy of Agricultural Sciences, Beijing 100081, China; <sup>2</sup>Beijing Key Laboratory of Agricultural Genetic Resources and Biotechnology, Institute of Biotechnology, Beijing Academy of Agriculture and Forestry Sciences, Beijing, 100097, China

\*Corresponding author Email: shujinshuai@caas.cn

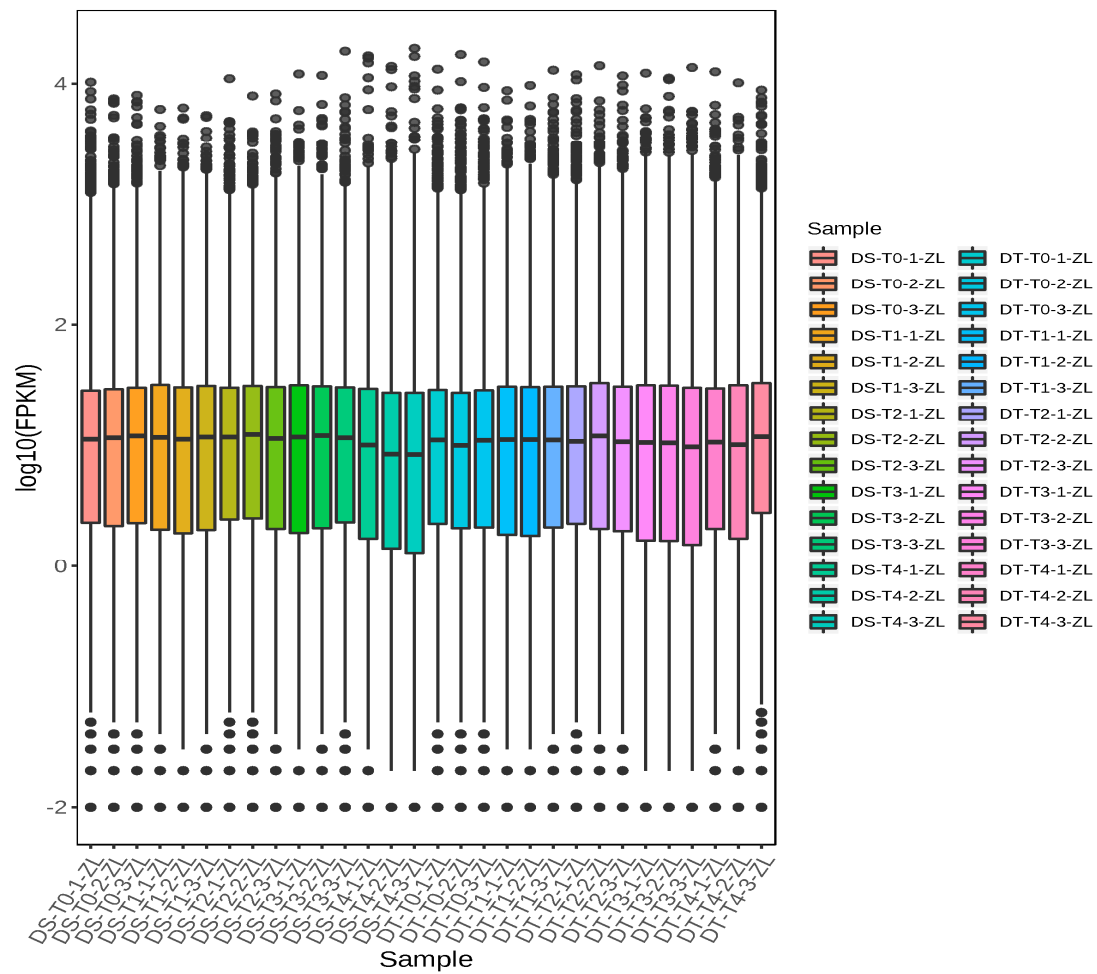

**Figure S1 Box plot of RNA-seq samples in DS and DT genotypes**

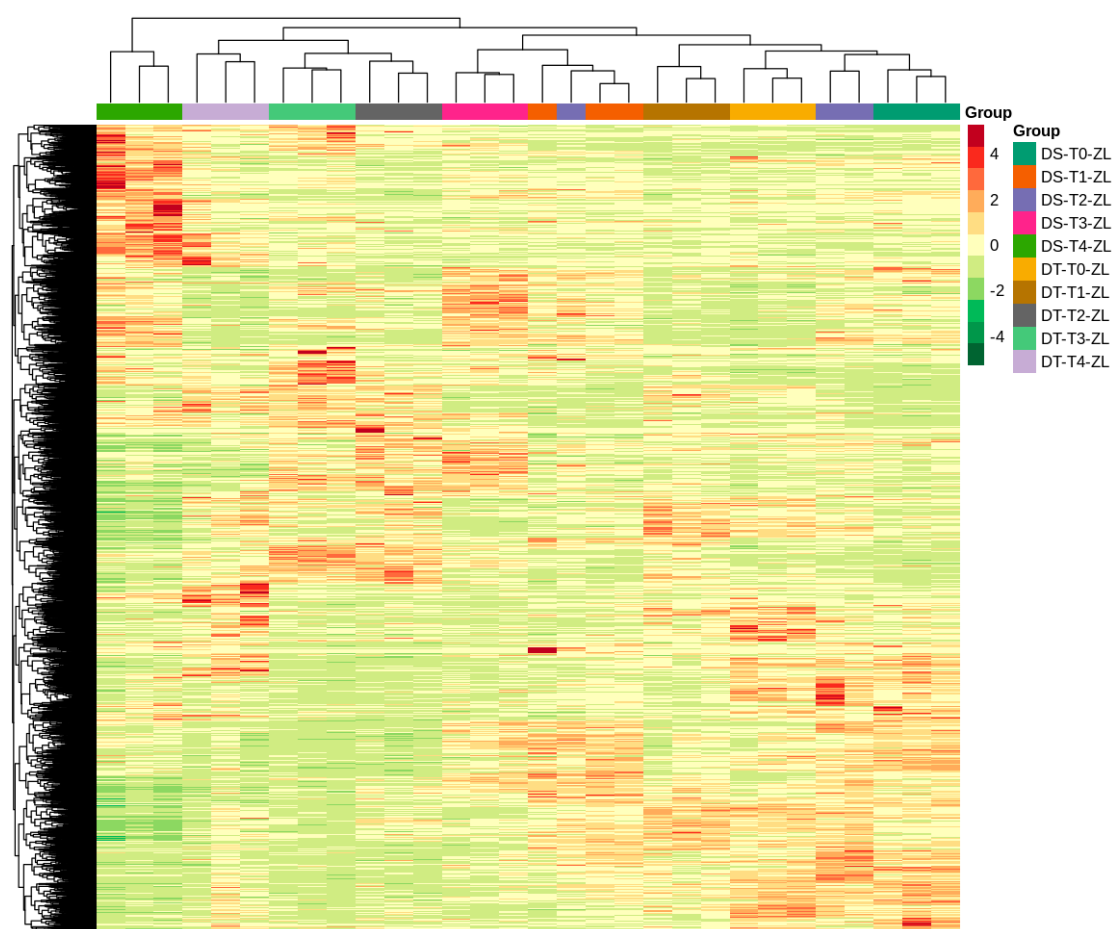

**Figure S2 Cluster heat map of RNA-seq samples in DS and DT genotypes**

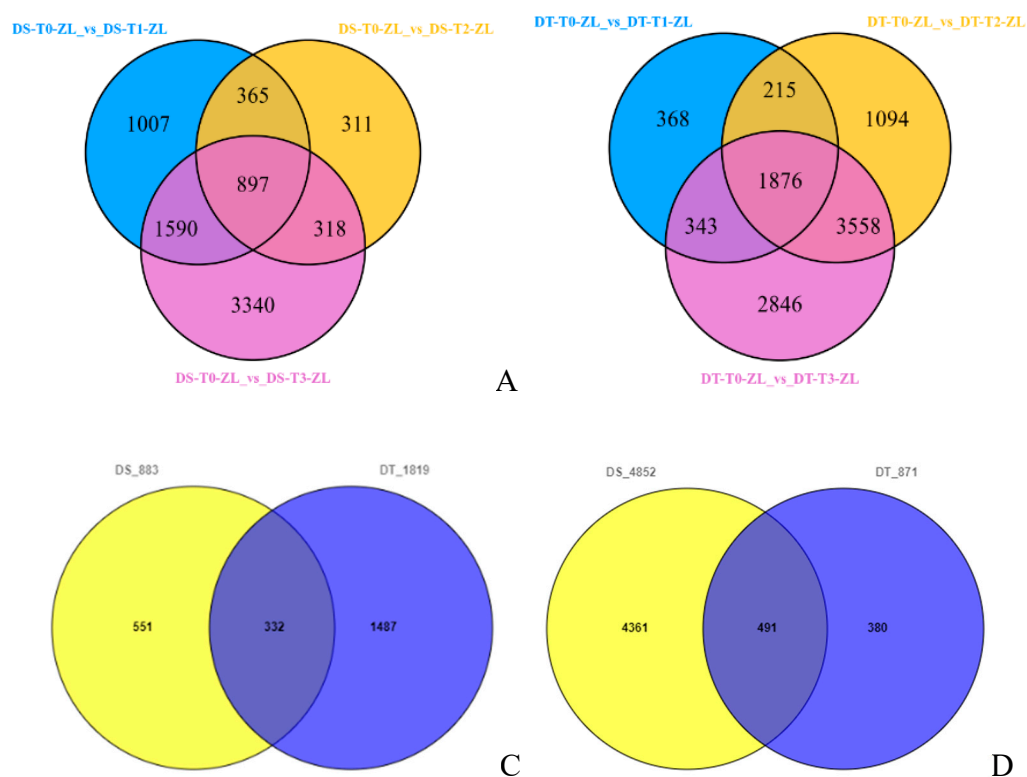

**Figure S3 Venn diagrams of DEGs common to DS and DT under drought and recovery conditions.** A: Venn diagram of DEGs in DS. B: Venn diagram of DEGs in DT. C: Venn diagram of the genes identified as DEGs at all drought stress time-points in DS and DT. D: Venn diagram of the genes identified as DEGs between DS and DT during rehydration.

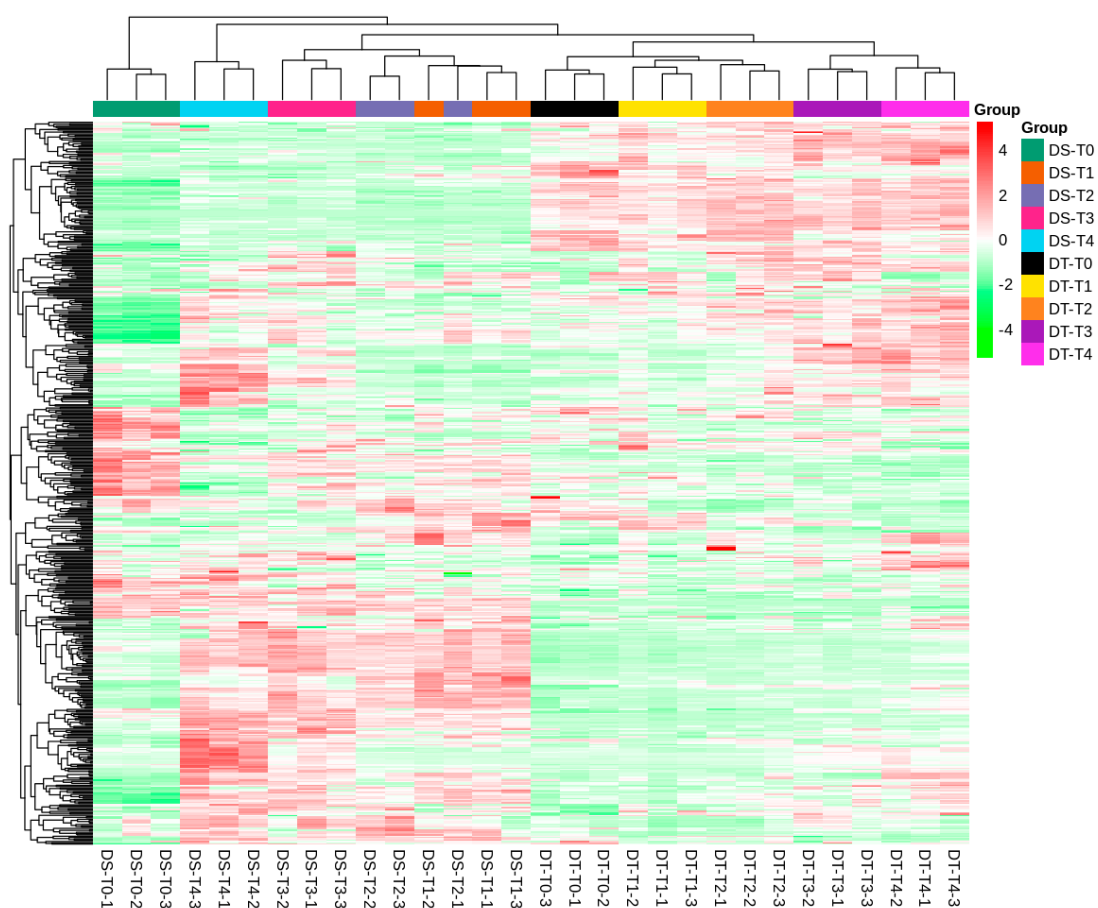

**Figure S4 Correlations among 30 metabolome samples in the DS and DT genotypes.**

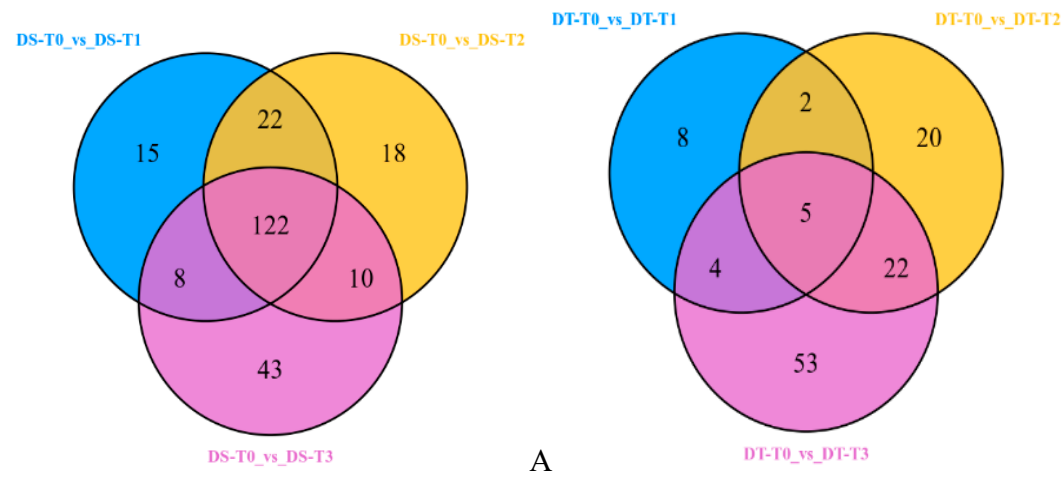

**Figure S5 Venn diagram of the differentially abundant metabolites in DS and DT under drought conditions.** A: Venn diagram of differentially abundant metabolites in DS. B: Venn diagram of differentially abundant metabolites in DT.
